# Supplementary material for: Identification and Characterization of Extracellular Vesicles and Its DNA Cargo Secreted During Murine Embryo Development
Source: MDPI journal article supplement (doi:10.3390/genes11020203), 2020-02-17
Supplement: s1 [file s1]

**Table S6. Sequencing analysis data for the enriched genes in the comparison Embryo vs blank control for gene sequences uniquely binding the *Mus musculus* reference genome.**

| id                        | chr   | start     | end       | gene                 | logFC        | logCPM      | FWER        |
|---------------------------|-------|-----------|-----------|----------------------|--------------|-------------|-------------|
| chr11_3125904_3131004     | chr11 | 3125904   | 3131004   | <i>Pisd-ps1</i>      | 12,4434361   | 7,546045555 | 2,22088E-15 |
| chr11_3131850_3193463     | chr11 | 3131850   | 3193463   | <i>Sfil</i>          | 5,126255729  | 10,26359019 | 1,32183E-26 |
| chr11_3142048_3143363     | chr11 | 3142048   | 3143363   | <i>Gm11399</i>       | 10,7839565   | 5,885694338 | 0,000583145 |
| chr11_97362551_97398542   | chr11 | 97362551  | 97398542  | <i>Socs7</i>         | -3,747903091 | 7,700942682 | 0,002937969 |
| chr12_84875769_84878132   | chr12 | 84875769  | 84878132  | <i>D030025P21Rik</i> | -12,69387428 | 5,759235308 | 0,000340618 |
| chr12_85110833_85134091   | chr12 | 85110833  | 85134091  | <i>Dlst</i>          | -4,676679299 | 7,350444007 | 0,000889823 |
| chr13_119487941_119610458 | chr13 | 119487941 | 119610458 | <i>Gm7120</i>        | 7,617197767  | 8,016567803 | 5,52161E-13 |
| chr13_119606650_119610458 | chr13 | 119606650 | 119610458 | <i>Gm21967</i>       | 11,97491097  | 6,493150042 | 9,57875E-07 |
| chr14_19415857_19418930   | chr14 | 19415857  | 19418930  | <i>Gm21738</i>       | 8,273137037  | 11,27633001 | 1,23374E-91 |
| chr14_55761428_55763229   | chr14 | 55761428  | 55763229  | <i>Ltb4r2</i>        | -10,04299512 | 4,214700737 | 0,032437241 |
| chr1_51987148_52107188    | chr1  | 51987148  | 52107188  | <i>Stat4</i>         | -3,777095341 | 8,015519032 | 0,004708806 |
| chr16_3858321_3884561     | chr16 | 3858321   | 3884561   | <i>Zfp597</i>        | -5,036663232 | 8,274119125 | 3,1775E-10  |
| chr16_3862384_3884505     | chr16 | 3862384   | 3884505   | <i>Gm26675</i>       | -5,164476194 | 8,233242076 | 1,91139E-10 |
| chr16_3872375_3904770     | chr16 | 3872375   | 3904770   | <i>Naa60</i>         | -4,71828314  | 8,18896789  | 7,66701E-08 |
| chr1_66924295_66945404    | chr1  | 66924295  | 66945404  | <i>Myl1</i>          | -6,622947525 | 6,768925192 | 3,01875E-06 |
| chr17_3076578_3084183     | chr17 | 3076578   | 3084183   | <i>Pisd-ps2</i>      | 8,675690394  | 7,019574733 | 2,13369E-08 |
| chr18_12599926_12737050   | chr18 | 12599926  | 12737050  | <i>Ttc39c</i>        | -3,707968306 | 8,834381996 | 2,88583E-06 |
| chr18_31804057_31908987   | chr18 | 31804057  | 31908987  | <i>Wdr33</i>         | -3,209811503 | 8,193309638 | 0,00904414  |
| chr1_85246851_85255465    | chr1  | 85246851  | 85255465  | <i>Gm16028</i>       | 9,35151981   | 5,900021751 | 0,024090475 |
| chr19_4510472_4621752     | chr19 | 4510472   | 4621752   | <i>Pcx</i>           | -3,574335232 | 8,385112978 | 0,000286942 |
| chr19_47512982_47516578   | chr19 | 47512982  | 47516578  | <i>Gm19557</i>       | 10,89816799  | 7,586933622 | 0,004041433 |
| chr19_6829085_6840601     | chr19 | 6829085   | 6840601   | <i>Rps6ka4</i>       | -7,543097748 | 6,637187928 | 0,000601881 |
| chr2_98662237_98664083    | chr2  | 98662237  | 98664083  | <i>Gm10801</i>       | 6,89666714   | 10,96506387 | 7,55159E-62 |
| chr2_98666547_98667301    | chr2  | 98666547  | 98667301  | <i>Gm10800</i>       | 6,944244257  | 13,24452273 | 2,1161E-218 |
| chr3_18054325_18057509    | chr3  | 18054325  | 18057509  | <i>Bhlhe22</i>       | -10,56310071 | 5,459748715 | 0,031763909 |
| chr3_87357881_87371074    | chr3  | 87357881  | 87371074  | <i>Cd5l</i>          | 8,798658154  | 7,454408039 | 8,68128E-05 |
| chr4_108165437_108179308  | chr4  | 108165437 | 108179308 | <i>Echdc2</i>        | 7,832486406  | 6,874000412 | 0,028966871 |
| chr4_136880129_136886187  | chr4  | 136880129 | 136886187 | <i>Clqb</i>          | -7,110530802 | 6,774645443 | 0,001640445 |
| chr4_146449023_146470292  | chr4  | 146449023 | 146470292 | <i>Gm13251</i>       | 9,925854511  | 5,521743569 | 0,032403253 |
| chr4_147136278_147457019  | chr4  | 147136278 | 147457019 | <i>Gm26624</i>       | 6,228645755  | 8,205763331 | 2,52459E-11 |
| chr5_113075839_113081584  | chr5  | 113075839 | 113081584 | <i>Crybb3</i>        | -6,022253083 | 6,932980048 | 0,001271325 |
| chr5_114917318_114923277  | chr5  | 114917318 | 114923277 | <i>Gm13822</i>       | 6,073272609  | 6,893369327 | 0,000306033 |
| chr5_120431770_120441222  | chr5  | 120431770 | 120441222 | <i>Lhx5</i>          | -6,37889882  | 5,587408615 | 0,048987405 |
| chr5_15516489_15656679    | chr5  | 15516489  | 15656679  | <i>Gm21847</i>       | 3,763343537  | 7,958187692 | 0,003849756 |
| chr5_73632749_73647713    | chr5  | 73632749  | 73647713  | <i>Sgcb</i>          | -5,903387381 | 6,403428526 | 0,00311244  |
| chr6_131219223_131247362  | chr6  | 131219223 | 131247362 | <i>Klra2</i>         | -5,648068117 | 6,734581227 | 0,000978627 |
| chr7_127191660_127196000  | chr7  | 127191660 | 127196000 | <i>Cd2bp2</i>        | -8,012067768 | 7,079640711 | 6,87923E-12 |
| chr7_28293553_28302238    | chr7  | 28293553  | 28302238  | <i>Dll3</i>          | -5,830726192 | 7,357718186 | 5,36797E-06 |
| chr8_20267774_20424814    | chr8  | 20267774  | 20424814  | <i>2610005L07Rik</i> | 6,805081977  | 6,842118026 | 3,64603E-05 |
| chr8_20292477_20420781    | chr8  | 20292477  | 20420781  | <i>Gm26804</i>       | 6,646008867  | 6,638582006 | 0,000361687 |
| chr9_3000282_3038313      | chr9  | 3000282   | 3038313   | <i>Gm26870</i>       | 8,750785408  | 13,36697924 | 0           |
| chr9_3000922_3002330      | chr9  | 3000922   | 3002330   | <i>Gm10722</i>       | 9,26468077   | 10,20332496 | 8,22289E-60 |
| chr9_3003346_3006948      | chr9  | 3003346   | 3006948   | <i>Gm11168</i>       | 8,763763844  | 10,43059198 | 1,77539E-62 |
| chr9_3015654_3017210      | chr9  | 3015654   | 3017210   | <i>Gm10720</i>       | 12,31296096  | 6,926367318 | 1,20983E-10 |
| chr9_3017408_3021593      | chr9  | 3017408   | 3021593   | <i>Gm10719</i>       | 8,589645834  | 9,192448379 | 4,44047E-31 |
| chr9_3023547_3025218      | chr9  | 3023547   | 3025218   | <i>Gm10718</i>       | 8,006741452  | 10,98695999 | 3,42465E-74 |
| chr9_3025417_3033289      | chr9  | 3025417   | 3033289   | <i>Gm10717</i>       | 9,353116186  | 10,91265059 | 1,07585E-88 |
| chr9_3034599_3035805      | chr9  | 3034599   | 3035805   | <i>Gm17535</i>       | 13,92422298  | 8,413677184 | 3,86757E-29 |

|                          |      |           |           |                |              |             |             |
|--------------------------|------|-----------|-----------|----------------|--------------|-------------|-------------|
| chr9_3036877_3038316     | chr9 | 3036877   | 3038316   | <i>Gm10715</i> | 12,48409232  | 6,896222485 | 9,22504E-11 |
| chrX_103083003_103083250 | chrX | 103083003 | 103083250 | <i>Gm14838</i> | -11,36443398 | 5,700875423 | 0,025784341 |
