# Supplementary material for: Identification and Characterization of Extracellular Vesicles and Its DNA Cargo Secreted During Murine Embryo Development
Source: MDPI journal article supplement (doi:10.3390/genes11020203), 2020-02-17
Supplement: s1 [file s1]

**Table S4. Sequencing analysis data for the enriched genes in the comparison naEVs vs blank control for total gene sequences.**

| <b>id</b>                 | <b>chr</b> | <b>start</b> | <b>end</b> | <b>gene</b>          | <b>logFC</b> | <b>logCPM</b> | <b>FWER</b> |
|---------------------------|------------|--------------|------------|----------------------|--------------|---------------|-------------|
| chr11_3125904_3131004     | chr11      | 3125904      | 3131004    | <i>Pisd-ps1</i>      | 9.172573713  | 7.397255473   | 4.64557E-05 |
| chr11_3131850_3193463     | chr11      | 3131850      | 3193463    | <i>Sfil</i>          | 5.379296795  | 10.22434998   | 3.56108E-07 |
| chr13_119487941_119610458 | chr13      | 119487941    | 119610458  | <i>Gm7120</i>        | 6.38645144   | 7.263377184   | 0.003043154 |
| chr17_3076578_3084183     | chr17      | 3076578      | 3084183    | <i>Pisd-ps2</i>      | 7.60704978   | 6.515271948   | 0.004782967 |
| chr2_177314520_177324307  | chr2       | 177314520    | 177324307  | <i>Gm14412</i>       | 8.346407844  | 5.312666059   | 0.038646267 |
| chr4_146449023_146470292  | chr4       | 146449023    | 146470292  | <i>Gm13251</i>       | 9.078900696  | 5.716532392   | 0.021494435 |
| chr4_147136278_147457019  | chr4       | 147136278    | 147457019  | <i>Gm26624</i>       | 5.087253628  | 8.424748607   | 0.000408962 |
| chr4_94556546_94557078    | chr4       | 94556546     | 94557078   | <i>Gm10306</i>       | -13.37921866 | 3.823907265   | 0.027535255 |
| chr5_114917318_114923277  | chr5       | 114917318    | 114923277  | <i>Gm13822</i>       | 7.469887046  | 6.688467058   | 6.25324E-05 |
| chr8_20267774_20424814    | chr8       | 20267774     | 20424814   | <i>2610005L07Rik</i> | 6.972939883  | 6.896152288   | 0.000425689 |
| chr8_20292477_20420781    | chr8       | 20292477     | 20420781   | <i>Gm26804</i>       | 7.025694476  | 6.50456744    | 0.004627101 |
| chr9_3015654_3017210      | chr9       | 3015654      | 3017210    | <i>Gm10720</i>       | 5.84286223   | 7.897328595   | 0.01442196  |
| chr9_3025417_3033289      | chr9       | 3025417      | 3033289    | <i>Gm10717</i>       | 6.495121466  | 10.88613073   | 0.011519888 |
| chr9_3034599_3035805      | chr9       | 3034599      | 3035805    | <i>Gm17535</i>       | 8.148925239  | 7.805421127   | 1.10621E-05 |
| chr9_3036877_3038316      | chr9       | 3036877      | 3038316    | <i>Gm10715</i>       | 7.711741567  | 7.297505812   | 0.000166673 |
