# Supplementary material for: Identification and Characterization of Extracellular Vesicles and Its DNA Cargo Secreted During Murine Embryo Development
Source: MDPI journal article supplement (doi:10.3390/genes11020203), 2020-02-17
Supplement: s1 [file s1]

**Table S10.** Gene sequences uniquely mapping to the *Mus musculus* reference genome enriched in the comparisons of the different DNase untreated samples (embryo genomic DNA, ABs, naEVs and SN) vs the blank control. Abbreviations: ABs, Apoptotic Bodies; Chr, Chromosome; FC, Fold Change; FWER, Family-Wise Error Rate; naEVs, non-apoptotic EVs; SN, Supernatant.

| Gene ID       | Chr | Embryo vs Blank |           | ABs vs Blank |           | naEVs vs Blank |           | SN vs Blank |           |
|---------------|-----|-----------------|-----------|--------------|-----------|----------------|-----------|-------------|-----------|
|               |     | log(FC)         | FWER      | log(FC)      | FWER      | log(FC)        | FWER      | log(FC)     | FWER      |
| 2610005L07Rik | 8   | 6.81            | 3.65E-05  | 6.85         | 5.45E-05  | 6.48           | 1.57E-04  | 5.98        | 1.31E-03  |
| C1qb          | 4   | -7.11           | 1.64E-03  | -7.61        | 4.30E-03  | -6.52          | 2.37E-02  | -9.62       | 1.98E-06  |
| Cd2bp2        | 7   | -8.01           | 6.88E-12  | -10.17       | 5.02E-13  | -7.27          | 1.94E-10  | -4.89       | 9.23E-03  |
| Cd5l          | 3   | 8.80            | 8.68E-05  | 9.48         | 1.76E-06  | 9.50           | 2.09E-06  | 12.68       | 4.63E-13  |
| Gm10715       | 9   | 12.48           | 9.23E-11  | 10.07        | 3.29E-06  | 10.72          | 1.53E-07  | 11.03       | 5.43E-08  |
| Gm10717       | 9   | 9.35            | 1.08E-88  | 7.35         | 1.96E-62  | 8.02           | 5.00E-72  | 8.33        | 1.25E-75  |
| Gm10718       | 9   | 8.01            | 3.42E-74  | 5.90         | 5.67E-46  | 6.53           | 4.88E-55  | 6.77        | 2.76E-58  |
| Gm10719       | 9   | 8.59            | 4.44E-31  | 6.31         | 1.21E-18  | 7.02           | 6.72E-23  | 7.33        | 2.08E-24  |
| Gm10720       | 9   | 12.31           | 1.21E-10  | 10.34        | 7.79E-07  | 10.92          | 4.95E-08  | 11.17       | 2.14E-08  |
| Gm10722       | 9   | 9.26            | 8.22E-60  | 7.13         | 1.70E-40  | 7.85           | 1.78E-47  | 8.16        | 5.02E-50  |
| Gm10800       | 2   | 6.94            | 2.12E-218 | 5.40         | 1.63E-147 | 5.99           | 2.39E-175 | 6.46        | 5.68E-199 |
| Gm10801       | 2   | 6.90            | 7.55E-62  | 5.57         | 1.80E-44  | 6.23           | 2.54E-53  | 6.74        | 3.26E-60  |
| Gm11168       | 9   | 8.76            | 1.78E-62  | 6.69         | 1.88E-41  | 7.32           | 1.82E-48  | 7.58        | 1.24E-50  |
| Gm11399       | 9   | 10.78           | 5.83E-04  | 9.96         | 7.98E-03  | 10.12          | 4.01E-03  | 10.01       | 7.77E-03  |
| Gm13822       | 5   | 6.07            | 3.06E-04  | 5.87         | 7.55E-04  | 6.12           | 2.11E-04  | 5.87        | 7.85E-04  |
| Gm17535       | 5   | 13.92           | 3.87E-29  | 11.58        | 3.90E-20  | 12.28          | 5.09E-23  | 12.48       | 1.48E-23  |
| Gm21738       | 5   | 8.27            | 1.23E-91  | 6.44         | 9.43E-63  | 7.14           | 1.29E-74  | 7.55        | 2.02E-80  |
| Gm26624       | 5   | 6.23            | 2.52E-11  | 6.59         | 2.88E-12  | 6.12           | 5.62E-11  | 5.60        | 4.51E-09  |
| Gm26804       | 8   | 6.65            | 3.62E-04  | 6.85         | 2.99E-04  | 6.42           | 9.35E-04  | 5.44        | 3.95E-02  |
| Gm26870       | 8   | 8.75            | 0.00E+00  | 6.68         | 4.16E-219 | 7.34           | 5.78E-256 | 7.65        | 4.43E-270 |
| Gm7120        | 8   | 7.62            | 5.52E-13  | 7.62         | 2.89E-13  | 7.90           | 5.79E-14  | 7.78        | 1.40E-13  |
| Pisd-ps1      | 8   | 12.44           | 2.22E-15  | 11.81        | 1.51E-13  | 11.52          | 6.05E-13  | 11.03       | 1.52E-11  |
| Pisd-ps2      | 9   | 8.68            | 2.13E-08  | 8.43         | 1.51E-07  | 7.98           | 6.27E-07  | 7.21        | 2.48E-05  |
| Sfi1          | 9   | 5.13            | 1.32E-26  | 4.59         | 3.11E-21  | 4.79           | 1.59E-23  | 5.46        | 6.46E-29  |
| Ttc39c        | 18  | -3.71           | 2.89E-06  | -4.00        | 1.66E-06  | -3.62          | 9.73E-06  | -3.24       | 4.26E-03  |
| Bhlhe22       | 3   | -10.56          | 3.18E-02  | -11.19       | 5.76E-03  |                |           | -11.16      | 3.93E-02  |
| Crybb3        | 5   | -6.02           | 1.27E-03  | -6.13        | 6.10E-03  | -6.24          | 5.41E-04  |             |           |
| Dll3          | 7   | -5.83           | 5.37E-06  | -5.93        | 5.25E-05  | -6.49          | 6.05E-08  |             |           |
| Dlst          | 12  | -4.68           | 8.90E-04  | -4.79        | 1.65E-03  | -4.35          | 1.38E-02  |             |           |
| Echdc2        | 4   | 7.83            | 2.90E-02  |              |           | 7.90           | 2.71E-02  | 12.83       | 9.46E-09  |
| Gm13251       | 4   | 9.93            | 3.24E-02  | 10.28        | 1.66E-02  | 10.35          | 1.22E-02  |             |           |
| Gm14838       | X   | -11.36          | 2.58E-02  | -11.62       | 7.10E-03  | -11.09         | 1.77E-02  |             |           |
| Gm15544       | 7   |                 |           | 8.47         | 2.29E-03  | 8.27           | 2.40E-03  | 12.72       | 2.92E-09  |
| Gm19557       | 19  | 10.90           | 4.04E-03  |              |           | 10.94          | 1.17E-02  | 12.34       | 2.29E-07  |
| Gm21847       | 5   | 3.76            | 3.85E-03  | 4.24         | 2.80E-04  | 3.96           | 1.19E-03  |             |           |
| Gm21967       | 13  | 11.97           | 9.58E-07  | 10.69        | 1.16E-04  | 12.55          | 1.42E-07  |             |           |
| Gm26675       | 16  | -5.16           | 1.91E-10  | -3.21        | 4.27E-02  | -5.26          | 1.87E-10  |             |           |
| Klra2         | 6   | -5.65           | 9.79E-04  | -8.81        | 1.90E-08  | -5.60          | 1.85E-03  |             |           |
| Naa60         | 16  | -4.72           | 7.67E-08  | -3.66        | 2.87E-03  | -4.89          | 3.48E-09  |             |           |
| Pcx           | 19  | -3.57           | 2.87E-04  | -3.07        | 4.06E-02  | -3.53          | 3.18E-04  |             |           |
| Zfp597        | 16  | -5.04           | 3.18E-10  | -3.22        | 2.64E-02  | -4.95          | 6.95E-10  |             |           |
| Cdh23         | 10  |                 |           | 1.65         | 1.00E-03  |                |           | 1.95        | 3.98E-06  |
| Gm16028       | 1   | 9.35            | 2.41E-02  |              |           |                |           | 11.09       | 8.91E-04  |
| Lhx5          | 5   | -6.38           | 4.90E-02  | -8.79        | 2.78E-03  |                |           |             |           |
| Myl1          | 1   | -6.62           | 3.02E-06  |              |           | -5.14          | 1.19E-02  |             |           |
| Nol12         | 15  |                 |           | -9.23        | 4.98E-03  | -6.78          | 4.84E-02  |             |           |
| Oas1h         | 5   |                 |           | 9.82         | 6.87E-03  |                |           | 11.71       | 3.01E-05  |
| Rps6ka4       | 19  | -7.54           | 6.02E-04  |              |           | -7.02          | 2.03E-02  |             |           |
| Sgcb          | 5   | -5.90           | 3.11E-03  |              |           | -5.92          | 3.54E-03  |             |           |





|                |    |  |  |        |          |  |       |          |
|----------------|----|--|--|--------|----------|--|-------|----------|
| <i>Tspan6</i>  | X  |  |  |        |          |  | -7.47 | 1.90E-02 |
| <i>Vezt</i>    | 10 |  |  |        |          |  | 4.46  | 1.40E-03 |
| <i>Vmn2r52</i> | 7  |  |  | -11.21 | 2.98E-04 |  |       |          |
| <i>Zfp426</i>  | 9  |  |  |        |          |  | 6.87  | 1.04E-05 |
| <i>Zfp57</i>   | 17 |  |  |        |          |  | 10.55 | 4.73E-02 |
