# Supplementary material for: Identification and Characterization of Extracellular Vesicles and Its DNA Cargo Secreted During Murine Embryo Development
Source: MDPI journal article supplement (doi:10.3390/genes11020203), 2020-02-17
Supplement: s1 [file s1]

**Table S5. Sequencing analysis data for the enriched genes in the comparison SN vs blank control for total gene sequences.**

| id                        | chr   | start     | end       | gene                 | logFC       | logCPM      | FWER        |
|---------------------------|-------|-----------|-----------|----------------------|-------------|-------------|-------------|
| chr11_3125904_3131004     | chr11 | 3125904   | 3131004   | <i>Pisd-ps1</i>      | 8,119390347 | 7,397255473 | 5,83453E-05 |
| chr11_3131850_3193463     | chr11 | 3131850   | 3193463   | <i>Sfi1</i>          | 6,424795282 | 10,22434998 | 1,39943E-08 |
| chr13_119487941_119610458 | chr13 | 119487941 | 119610458 | <i>Gm7120</i>        | 7,136693317 | 7,263377184 | 0,000714972 |
| chr17_3076578_3084183     | chr17 | 3076578   | 3084183   | <i>Pisd-ps2</i>      | 7,337428858 | 6,515271948 | 0,008524015 |
| chr1_84992690_85270566    | chr1  | 84992690  | 85270566  | <i>C130026I21Rik</i> | 5,611124255 | 7,835852661 | 0,00380244  |
| chr4_147018235_147492201  | chr4  | 147018235 | 147492201 | <i>C230088H06Rik</i> | 3,177580342 | 8,922407064 | 0,027282166 |
| chr4_147136278_147457019  | chr4  | 147136278 | 147457019 | <i>Gm26624</i>       | 5,367707959 | 8,424748607 | 0,000228725 |
| chr5_114917318_114923277  | chr5  | 114917318 | 114923277 | <i>Gm13822</i>       | 7,178907453 | 6,688467058 | 0,000126946 |
| chr8_20267774_20424814    | chr8  | 20267774  | 20424814  | <i>2610005L07Rik</i> | 7,110188675 | 6,896152288 | 0,000348045 |
| chr8_20292477_20420781    | chr8  | 20292477  | 20420781  | <i>Gm26804</i>       | 6,663357319 | 6,50456744  | 0,009825116 |
| chr9_109676734_109702700  | chr9  | 109676734 | 109702700 | <i>Fbxw18</i>        | 7,532741397 | 6,779255967 | 0,002975929 |
| chr9_3015654_3017210      | chr9  | 3015654   | 3017210   | <i>Gm10720</i>       | 6,641446263 | 7,897328595 | 0,00253916  |
| chr9_3025417_3033289      | chr9  | 3025417   | 3033289   | <i>Gm10717</i>       | 7,13252915  | 10,88613073 | 0,004574878 |
| chr9_3034599_3035805      | chr9  | 3034599   | 3035805   | <i>Gm17535</i>       | 8,773454196 | 7,805421127 | 3,19138E-06 |
| chr9_3036877_3038316      | chr9  | 3036877   | 3038316   | <i>Gm10715</i>       | 8,24416085  | 7,297505812 | 6,05965E-05 |
