# Supplementary material for: Identification and Characterization of Extracellular Vesicles and Its DNA Cargo Secreted During Murine Embryo Development
Source: MDPI journal article supplement (doi:10.3390/genes11020203), 2020-02-17
Supplement: s1 [file s1]

**Table S8. Sequencing analysis data for the enriched genes in the comparison naEVs vs blank control for gene sequences uniquely binding the *Mus musculus* reference genome.**

| id                        | chr   | start     | end       | gene                 | logFC        | logCPM      | FWER        |
|---------------------------|-------|-----------|-----------|----------------------|--------------|-------------|-------------|
| chr11_116280939_116283938 | chr11 | 116280939 | 116283938 | <i>Galr2</i>         | -5.951659478 | 6.762493549 | 0.003265658 |
| chr11_3125904_3131004     | chr11 | 3125904   | 3131004   | <i>Pisd-ps1</i>      | 11.51870399  | 7.546045555 | 6.04819E-13 |
| chr11_3131850_3193463     | chr11 | 3131850   | 3193463   | <i>Sfi1</i>          | 4.791174808  | 10.26359019 | 1.59001E-23 |
| chr11_3142048_3143363     | chr11 | 3142048   | 3143363   | <i>Gm11399</i>       | 10.12007364  | 5.885694338 | 0.004013355 |
| chr1_191351981_191397041  | chr1  | 191351981 | 191397041 | <i>Ppp2r5a</i>       | -5.173465671 | 7.160724603 | 0.00510022  |
| chr11_97362551_97398542   | chr11 | 97362551  | 97398542  | <i>Socs7</i>         | -3.636715773 | 7.700942682 | 0.007489596 |
| chr12_112588784_112615556 | chr12 | 112588784 | 112615556 | <i>Inf2</i>          | -5.03402328  | 6.855061312 | 0.03737192  |
| chr12_85110833_85134091   | chr12 | 85110833  | 85134091  | <i>Dlst</i>          | -4.352699034 | 7.350444007 | 0.013846499 |
| chr13_119487941_119610458 | chr13 | 119487941 | 119610458 | <i>Gm7120</i>        | 7.895964085  | 8.016567803 | 5.79003E-14 |
| chr13_119606650_119610458 | chr13 | 119606650 | 119610458 | <i>Gm21967</i>       | 12.54560826  | 6.493150042 | 1.42339E-07 |
| chr14_19415857_19418930   | chr14 | 19415857  | 19418930  | <i>Gm21738</i>       | 7.141398219  | 11.27633001 | 1.29072E-74 |
| chr1_51987148_52107188    | chr1  | 51987148  | 52107188  | <i>Stat4</i>         | -3.950010419 | 8.015519032 | 0.000636886 |
| chr15_78934933_78943634   | chr15 | 78934933  | 78943634  | <i>Nol12</i>         | -6.782239902 | 5.31789469  | 0.048356851 |
| chr16_3858321_3884561     | chr16 | 3858321   | 3884561   | <i>Zfp597</i>        | -4.949762896 | 8.274119125 | 6.9456E-10  |
| chr16_3862384_3884505     | chr16 | 3862384   | 3884505   | <i>Gm26675</i>       | -5.259544986 | 8.233242076 | 1.8721E-10  |
| chr16_3872375_3904770     | chr16 | 3872375   | 3904770   | <i>Naa60</i>         | -4.89367574  | 8.18896789  | 3.4796E-09  |
| chr1_66924295_66945404    | chr1  | 66924295  | 66945404  | <i>Myl1</i>          | -5.143499332 | 6.768925192 | 0.01192866  |
| chr17_3076578_3084183     | chr17 | 3076578   | 3084183   | <i>Pisd-ps2</i>      | 7.979550831  | 7.019574733 | 6.26906E-07 |
| chr18_12599926_12737050   | chr18 | 12599926  | 12737050  | <i>Ttc39c</i>        | -3.620377591 | 8.834381996 | 9.73476E-06 |
| chr18_31804057_31908987   | chr18 | 31804057  | 31908987  | <i>Wdr33</i>         | -2.95824482  | 8.193309638 | 0.038910843 |
| chr19_42755105_42779978   | chr19 | 42755105  | 42779978  | <i>Hps1</i>          | -4.312112739 | 7.005513375 | 0.017013678 |
| chr19_44548572_44555440   | chr19 | 44548572  | 44555440  | <i>Ndufb8</i>        | -7.307537509 | 5.400361398 | 0.008757844 |
| chr19_4510472_4621752     | chr19 | 4510472   | 4621752   | <i>Pcx</i>           | -3.532947685 | 8.385112978 | 0.000318327 |
| chr19_47512982_47516578   | chr19 | 47512982  | 47516578  | <i>Gm19557</i>       | 10.94331846  | 7.586933622 | 0.011684977 |
| chr19_6829085_6840601     | chr19 | 6829085   | 6840601   | <i>Rps6ka4</i>       | -7.017000754 | 6.637187928 | 0.020318911 |
| chr2_98662237_98664083    | chr2  | 98662237  | 98664083  | <i>Gm10801</i>       | 6.228353651  | 10.96506387 | 2.5356E-53  |
| chr2_98666547_98667301    | chr2  | 98666547  | 98667301  | <i>Gm10800</i>       | 5.989227147  | 13.24452273 | 2.3875E-175 |
| chr3_87357881_87371074    | chr3  | 87357881  | 87371074  | <i>Cd5l</i>          | 9.500628601  | 7.454408039 | 2.09256E-06 |
| chr4_107126613_107136252  | chr4  | 107126613 | 107136252 | <i>Gm12802</i>       | -7.746999557 | 5.614033243 | 0.000243199 |
| chr4_108165437_108179308  | chr4  | 108165437 | 108179308 | <i>Echdc2</i>        | 7.899424042  | 6.874000412 | 0.027120545 |
| chr4_133964738_133968650  | chr4  | 133964738 | 133968650 | <i>Hmgn2</i>         | -10.32138708 | 4.889345786 | 0.031677526 |
| chr4_136880129_136886187  | chr4  | 136880129 | 136886187 | <i>C1qb</i>          | -6.517603507 | 6.774645443 | 0.023710039 |
| chr4_146449023_146470292  | chr4  | 146449023 | 146470292 | <i>Gm13251</i>       | 10.34852498  | 5.521743569 | 0.012245168 |
| chr4_147136278_147457019  | chr4  | 147136278 | 147457019 | <i>Gm26624</i>       | 6.120195604  | 8.205763331 | 5.62323E-11 |
| chr5_113075839_113081584  | chr5  | 113075839 | 113081584 | <i>Crybb3</i>        | -6.238322052 | 6.932980048 | 0.000541336 |
| chr5_114917318_114923277  | chr5  | 114917318 | 114923277 | <i>Gm13822</i>       | 6.124761839  | 6.893369327 | 0.000211117 |
| chr5_15516489_15656679    | chr5  | 15516489  | 15656679  | <i>Gm21847</i>       | 3.955896544  | 7.958187692 | 0.001187405 |
| chr5_73632749_73647713    | chr5  | 73632749  | 73647713  | <i>Sgcb</i>          | -5.918119779 | 6.403428526 | 0.00353774  |
| chr6_131219223_131247362  | chr6  | 131219223 | 131247362 | <i>Klra2</i>         | -5.597463376 | 6.734581227 | 0.001854914 |
| chr6_132855438_132856355  | chr6  | 132855438 | 132856355 | <i>Tas2r116</i>      | -10.91701075 | 4.725382268 | 0.010994983 |
| chr6_143167230_143208542  | chr6  | 143167230 | 143208542 | <i>Emkl</i>          | -3.876651486 | 7.442291552 | 0.030187678 |
| chr7_127191660_127196000  | chr7  | 127191660 | 127196000 | <i>Cd2bp2</i>        | -7.26994817  | 7.079640711 | 1.94102E-10 |
| chr7_28293553_28302238    | chr7  | 28293553  | 28302238  | <i>Dll3</i>          | -6.487078517 | 7.357718186 | 6.04774E-08 |
| chr7_80429210_80430740    | chr7  | 80429210  | 80430740  | <i>Gm15544</i>       | 8.266849146  | 7.129400261 | 0.00239783  |
| chr8_20267774_20424814    | chr8  | 20267774  | 20424814  | <i>2610005L07Rik</i> | 6.482496587  | 6.842118026 | 0.000157169 |
| chr8_20292477_20420781    | chr8  | 20292477  | 20420781  | <i>Gm26804</i>       | 6.417031477  | 6.638582006 | 0.000935245 |
| chr9_3000282_3038313      | chr9  | 3000282   | 3038313   | <i>Gm26870</i>       | 7.340336564  | 13.36697924 | 5.7842E-256 |
| chr9_3000922_3002330      | chr9  | 3000922   | 3002330   | <i>Gm10722</i>       | 7.851197209  | 10.20332496 | 1.78081E-47 |
| chr9_3003346_3006948      | chr9  | 3003346   | 3006948   | <i>Gm11168</i>       | 7.320062285  | 10.43059198 | 1.82182E-48 |
| chr9_3015654_3017210      | chr9  | 3015654   | 3017210   | <i>Gm10720</i>       | 10.91757068  | 6.926367318 | 4.95127E-08 |
| chr9_3017408_3021593      | chr9  | 3017408   | 3021593   | <i>Gm10719</i>       | 7.01669075   | 9.192448379 | 6.71884E-23 |
| chr9_3023547_3025218      | chr9  | 3023547   | 3025218   | <i>Gm10718</i>       | 6.528125684  | 10.98695999 | 4.87891E-55 |
| chr9_3025417_3033289      | chr9  | 3025417   | 3033289   | <i>Gm10717</i>       | 8.01507627   | 10.91265059 | 5.00392E-72 |

|                          |      |           |           |                |              |             |             |
|--------------------------|------|-----------|-----------|----------------|--------------|-------------|-------------|
| chr9_3034599_3035805     | chr9 | 3034599   | 3035805   | <i>Gm17535</i> | 12.27860312  | 8.413677184 | 5.09085E-23 |
| chr9_3036877_3038316     | chr9 | 3036877   | 3038316   | <i>Gm10715</i> | 10.71903952  | 6.896222485 | 1.53442E-07 |
| chrX_103083003_103083250 | chrX | 103083003 | 103083250 | <i>Gm14838</i> | -11.08848988 | 5.700875423 | 0.017657604 |
