# Supplementary material for: Identification and Characterization of Extracellular Vesicles and Its DNA Cargo Secreted During Murine Embryo Development
Source: MDPI journal article supplement (doi:10.3390/genes11020203), 2020-02-17
Supplement: s1 [file s1]

**Table S7. Sequencing analysis data for the enriched genes in the comparison ABs vs blank control for gene sequences uniquely binding the *Mus musculus* reference genome.**

| id                        | chr   | start     | end       | gene                 | logFC        | logCPM      | FWER        |
|---------------------------|-------|-----------|-----------|----------------------|--------------|-------------|-------------|
| chr10_118860826_118863542 | chr10 | 118860826 | 118863542 | <i>4932442E05Rik</i> | -11,44497403 | 5,490516418 | 5,30905E-05 |
| chr10_60302748_60696490   | chr10 | 60302748  | 60696490  | <i>Cdh23</i>         | 1,649099291  | 11,14954224 | 0,001003649 |
| chr11_117966079_117970047 | chr11 | 117966079 | 117970047 | <i>Socs3</i>         | -10,60460116 | 5,513478721 | 0,011288099 |
| chr11_3125904_3131004     | chr11 | 3125904   | 3131004   | <i>Pisd-ps1</i>      | 11,80927499  | 7,546045555 | 1,50798E-13 |
| chr11_3131850_3193463     | chr11 | 3131850   | 3193463   | <i>Sfil</i>          | 4,587147054  | 10,26359019 | 3,10764E-21 |
| chr11_3142048_3143363     | chr11 | 3142048   | 3143363   | <i>Gm11399</i>       | 9,961999811  | 5,885694338 | 0,007977605 |
| chr12_85110833_85134091   | chr12 | 85110833  | 85134091  | <i>Dlst</i>          | -4,7862089   | 7,350444007 | 0,001652127 |
| chr13_119487941_119610458 | chr13 | 119487941 | 119610458 | <i>Gm7120</i>        | 7,615347032  | 8,016567803 | 2,89096E-13 |
| chr13_119606650_119610458 | chr13 | 119606650 | 119610458 | <i>Gm21967</i>       | 10,6929194   | 6,493150042 | 0,000116243 |
| chr13_40715675_40733823   | chr13 | 40715675  | 40733823  | <i>Tfap2a</i>        | -8,343717347 | 6,112572126 | 0,002283518 |
| chr13_55825051_55836192   | chr13 | 55825051  | 55836192  | <i>Pitx1</i>         | -8,588552816 | 5,182515654 | 0,025569443 |
| chr14_103080239_103099566 | chr14 | 103080239 | 103099566 | <i>Fbxl3</i>         | -8,448893965 | 5,336815217 | 0,008721141 |
| chr14_19415857_19418930   | chr14 | 19415857  | 19418930  | <i>Gm21738</i>       | 6,435395652  | 11,27633001 | 9,43189E-63 |
| chr15_78934933_78943634   | chr15 | 78934933  | 78943634  | <i>Nol12</i>         | -9,232547269 | 5,31789469  | 0,004980914 |
| chr16_17646470_17650738   | chr16 | 17646470  | 17650738  | <i>Ccdc74a</i>       | -10,95546274 | 5,291543693 | 0,019483114 |
| chr16_3858321_3884561     | chr16 | 3858321   | 3884561   | <i>Zfp597</i>        | -3,224581974 | 8,274119125 | 0,02641821  |
| chr16_3862384_3884505     | chr16 | 3862384   | 3884505   | <i>Gm26675</i>       | -3,211423001 | 8,233242076 | 0,042689523 |
| chr16_3872375_3904770     | chr16 | 3872375   | 3904770   | <i>Naa60</i>         | -3,664784093 | 8,18896789  | 0,002872563 |
| chr17_3076578_3084183     | chr17 | 3076578   | 3084183   | <i>Pisd-ps2</i>      | 8,428946455  | 7,019574733 | 1,50917E-07 |
| chr18_12599926_12737050   | chr18 | 12599926  | 12737050  | <i>Ttc39c</i>        | -3,997609778 | 8,834381996 | 1,66364E-06 |
| chr19_4510472_4621752     | chr19 | 4510472   | 4621752   | <i>Pcx</i>           | -3,068176955 | 8,385112978 | 0,040579582 |
| chr2_129493570_129515807  | chr2  | 129493570 | 129515807 | <i>Gm14040</i>       | 6,287116982  | 6,60815214  | 0,000672688 |
| chr2_98662237_98664083    | chr2  | 98662237  | 98664083  | <i>Gm10801</i>       | 5,573431001  | 10,96506387 | 1,7983E-44  |
| chr2_98666547_98667301    | chr2  | 98666547  | 98667301  | <i>Gm10800</i>       | 5,398501235  | 13,24452273 | 1,6303E-147 |
| chr3_18054325_18057509    | chr3  | 18054325  | 18057509  | <i>Bhlhe22</i>       | -11,18760684 | 5,459748715 | 0,005758204 |
| chr3_87357881_87371074    | chr3  | 87357881  | 87371074  | <i>Cd5l</i>          | 9,477049379  | 7,454408039 | 1,75626E-06 |
| chr3_89767511_89773240    | chr3  | 89767511  | 89773240  | <i>4632404H12Rik</i> | -10,90830077 | 4,763813185 | 0,009061917 |
| chr4_101647718_101659364  | chr4  | 101647718 | 101659364 | <i>Leprot</i>        | 8,029721427  | 5,44621344  | 0,044954295 |
| chr4_136880129_136886187  | chr4  | 136880129 | 136886187 | <i>Clqb</i>          | -7,609111026 | 6,774645443 | 0,004295518 |
| chr4_146449023_146470292  | chr4  | 146449023 | 146470292 | <i>Gm13251</i>       | 10,27716383  | 5,521743569 | 0,016575473 |
| chr4_147136278_147457019  | chr4  | 147136278 | 147457019 | <i>Gm26624</i>       | 6,592050641  | 8,205763331 | 2,87695E-12 |
| chr5_113075839_113081584  | chr5  | 113075839 | 113081584 | <i>Crybb3</i>        | -6,127593361 | 6,932980048 | 0,006103303 |
| chr5_114917318_114923277  | chr5  | 114917318 | 114923277 | <i>Gm13822</i>       | 5,87168909   | 6,893369327 | 0,000755277 |
| chr5_120431770_120441222  | chr5  | 120431770 | 120441222 | <i>Lhx5</i>          | -8,788398857 | 5,587408615 | 0,002781808 |
| chr5_120861421_120873512  | chr5  | 120861421 | 120873512 | <i>Oas1h</i>         | 9,819822415  | 6,052533243 | 0,006867565 |
| chr5_15516489_15656679    | chr5  | 15516489  | 15656679  | <i>Gm21847</i>       | 4,239263018  | 7,958187692 | 0,000280404 |
| chr5_24751003_24758008    | chr5  | 24751003  | 24758008  | <i>Crygn</i>         | -7,422898455 | 5,603219896 | 0,015919862 |
| chr6_119479668_119483886  | chr6  | 119479668 | 119483886 | <i>Fbxl14</i>        | -11,28156843 | 4,170098997 | 0,035451902 |
| chr6_131219223_131247362  | chr6  | 131219223 | 131247362 | <i>Klra2</i>         | -8,807357173 | 6,734581227 | 1,90282E-08 |
| chr6_132855438_132856355  | chr6  | 132855438 | 132856355 | <i>Tas2r116</i>      | -11,41464129 | 4,725382268 | 0,005321471 |
| chr7_10158652_10176286    | chr7  | 10158652  | 10176286  | <i>Vmn2r52</i>       | -11,20601073 | 5,485537521 | 0,000298253 |
| chr7_127191660_127196000  | chr7  | 127191660 | 127196000 | <i>Cd2bp2</i>        | -10,17244457 | 7,079640711 | 5,02468E-13 |
| chr7_26061495_26096196    | chr7  | 26061495  | 26096196  | <i>Cyp2b13</i>       | 4,973740516  | 6,992510956 | 0,007538791 |
| chr7_28293553_28302238    | chr7  | 28293553  | 28302238  | <i>Dll3</i>          | -5,932909923 | 7,357718186 | 5,25182E-05 |
| chr7_80429210_80430740    | chr7  | 80429210  | 80430740  | <i>Gm15544</i>       | 8,468435843  | 7,129400261 | 0,00228763  |
| chr8_20267774_20424814    | chr8  | 20267774  | 20424814  | <i>2610005L07Rik</i> | 6,85111491   | 6,842118026 | 5,45057E-05 |
| chr8_20292477_20420781    | chr8  | 20292477  | 20420781  | <i>Gm26804</i>       | 6,849295066  | 6,638582006 | 0,000298566 |
| chr8_22974844_23150497    | chr8  | 22974844  | 23150497  | <i>Ank1</i>          | 3,13576689   | 8,412277131 | 0,018561041 |

|                          |      |           |           |                |              |             |             |
|--------------------------|------|-----------|-----------|----------------|--------------|-------------|-------------|
| chr9_3000282_3038313     | chr9 | 3000282   | 3038313   | <i>Gm26870</i> | 6,67962923   | 13,36697924 | 4,1606E-219 |
| chr9_3000922_3002330     | chr9 | 3000922   | 3002330   | <i>Gm10722</i> | 7,132626176  | 10,20332496 | 1,7039E-40  |
| chr9_3003346_3006948     | chr9 | 3003346   | 3006948   | <i>Gm11168</i> | 6,689037227  | 10,43059198 | 1,8761E-41  |
| chr9_3015654_3017210     | chr9 | 3015654   | 3017210   | <i>Gm10720</i> | 10,34489138  | 6,926367318 | 7,78641E-07 |
| chr9_3017408_3021593     | chr9 | 3017408   | 3021593   | <i>Gm10719</i> | 6,314750201  | 9,192448379 | 1,21113E-18 |
| chr9_3023547_3025218     | chr9 | 3023547   | 3025218   | <i>Gm10718</i> | 5,899088857  | 10,98695999 | 5,67399E-46 |
| chr9_3025417_3033289     | chr9 | 3025417   | 3033289   | <i>Gm10717</i> | 7,352998505  | 10,91265059 | 1,9642E-62  |
| chr9_3034599_3035805     | chr9 | 3034599   | 3035805   | <i>Gm17535</i> | 11,57642475  | 8,413677184 | 3,9047E-20  |
| chr9_3036877_3038316     | chr9 | 3036877   | 3038316   | <i>Gm10715</i> | 10,07172229  | 6,896222485 | 3,28643E-06 |
| chrX_103083003_103083250 | chrX | 103083003 | 103083250 | <i>Gm14838</i> | -11,61920642 | 5,700875423 | 0,00709982  |
