# Supplementary material for: Identification and Characterization of Extracellular Vesicles and Its DNA Cargo Secreted During Murine Embryo Development
Source: MDPI journal article supplement (doi:10.3390/genes11020203), 2020-02-17
Supplement: s1 [file s1]

**Table S9. Sequencing analysis data for the enriched genes in the comparison SN vs blank control for gene sequences uniquely binding the *Mus musculus* reference genome.**

| id                        | chr   | start     | end       | gene                 | logFC        | logCPM      | FWER        |
|---------------------------|-------|-----------|-----------|----------------------|--------------|-------------|-------------|
| chr10_122678762_122945795 | chr10 | 122678762 | 122945795 | <i>Ppm1h</i>         | 3,021867878  | 9,016642224 | 0,002221176 |
| chr10_127525473_127534559 | chr10 | 127525473 | 127534559 | <i>Nxph4</i>         | 8,714818747  | 6,251114639 | 0,007421448 |
| chr10_42740539_42758660   | chr10 | 42740539  | 42758660  | <i>Gm15199</i>       | 5,947590086  | 7,225915611 | 0,000127542 |
| chr10_60302748_60696490   | chr10 | 60302748  | 60696490  | <i>Cdh23</i>         | 1,948144631  | 11,14954224 | 3,97675E-06 |
| chr10_81292963_81319973   | chr10 | 81292963  | 81319973  | <i>Pip5k1c</i>       | 4,165660322  | 7,876645963 | 0,036704001 |
| chr10_81606270_81620703   | chr10 | 81606270  | 81620703  | <i>BC025920</i>      | 6,770304422  | 6,992024552 | 0,001853612 |
| chr10_81606368_81609791   | chr10 | 81606368  | 81609791  | <i>Gm26896</i>       | 8,515520383  | 6,920303216 | 0,004733443 |
| chr10_93939165_94035817   | chr10 | 93939165  | 94035817  | <i>Vezt</i>          | 4,455336642  | 8,093543263 | 0,001398659 |
| chr11_101367561_101377903 | chr11 | 101367561 | 101377903 | <i>G6pc</i>          | 11,14270919  | 5,589509746 | 0,005467388 |
| chr11_102189620_102194081 | chr11 | 102189620 | 102194081 | <i>G6pc3</i>         | -11,03901433 | 5,591848559 | 0,013153547 |
| chr11_11557421_11579460   | chr11 | 11557421  | 11579460  | <i>Gm11998</i>       | 7,91787874   | 7,207639709 | 3,94419E-06 |
| chr11_119228572_119265236 | chr11 | 119228572 | 119265236 | <i>Ccdc40</i>        | 5,502141535  | 9,373923275 | 3,0211E-11  |
| chr11_120007313_120047167 | chr11 | 120007313 | 120047167 | <i>AatK</i>          | 4,116809758  | 8,43121019  | 0,000745711 |
| chr11_120064430_120086827 | chr11 | 120064430 | 120086827 | <i>Azi1</i>          | 6,527221649  | 7,69616468  | 2,97035E-05 |
| chr11_20685084_20741589   | chr11 | 20685084  | 20741589  | <i>AfipH</i>         | 4,036386185  | 9,021198482 | 1,45357E-05 |
| chr11_3125904_3131004     | chr11 | 3125904   | 3131004   | <i>Pisd-ps1</i>      | 11,03437842  | 7,546045555 | 1,51647E-11 |
| chr11_3131850_3193463     | chr11 | 3131850   | 3193463   | <i>Sfi1</i>          | 5,461594399  | 10,26359019 | 6,45896E-29 |
| chr11_3142048_3143363     | chr11 | 3142048   | 3143363   | <i>Gm11399</i>       | 10,01045642  | 5,885694338 | 0,00776851  |
| chr11_50174444_50200115   | chr11 | 50174444  | 50200115  | <i>3010026O09Rik</i> | 8,4689081    | 6,155254074 | 0,000913418 |
| chr11_69183932_69197843   | chr11 | 69183932  | 69197843  | <i>Alox8</i>         | 7,897638413  | 6,677223736 | 0,000610947 |
| chr11_80046493_80080991   | chr11 | 80046493  | 80080991  | <i>Crlf3</i>         | 7,245023449  | 6,888126572 | 9,13013E-05 |
| chr1_180568955_180601253  | chr1  | 180568955 | 180601253 | <i>Parp1</i>         | 8,081431993  | 8,142560563 | 5,82567E-12 |
| chr1_180942344_180975112  | chr1  | 180942344 | 180975112 | <i>Tmem63a</i>       | 4,635829021  | 7,817913194 | 0,009310733 |
| chr11_82942341_82960681   | chr11 | 82942341  | 82960681  | <i>1700003F17Rik</i> | 6,98789459   | 5,885284081 | 0,02908363  |
| chr1_182954788_182976044  | chr1  | 182954788 | 182976044 | <i>Tlr5</i>          | 7,089506571  | 8,029790085 | 5,17347E-08 |
| chr11_8826708_8973266     | chr11 | 8826708   | 8973266   | <i>Pkd1l1</i>        | 4,99258433   | 9,132365413 | 3,43106E-09 |
| chr12_73584797_73778185   | chr12 | 73584797  | 73778185  | <i>Prkch</i>         | 3,231444359  | 8,607248121 | 0,016002699 |
| chr13_105149352_105271039 | chr13 | 105149352 | 105271039 | <i>Rnf180</i>        | 4,381884897  | 8,466768284 | 3,34239E-05 |
| chr13_119487941_119610458 | chr13 | 119487941 | 119610458 | <i>Gm7120</i>        | 7,780541523  | 8,016567803 | 1,39897E-13 |
| chr13_53109312_53286124   | chr13 | 53109312  | 53286124  | <i>Ror2</i>          | 3,853383391  | 9,469311176 | 1,7036E-08  |
| chr13_64058274_64089201   | chr13 | 64058274  | 64089201  | <i>Hsd17b3</i>       | 5,728701157  | 7,280433308 | 0,000766119 |
| chr13_93674433_93752831   | chr13 | 93674433  | 93752831  | <i>Dmgdh</i>         | 4,653358324  | 8,28224771  | 0,000726287 |
| chr14_19415857_19418930   | chr14 | 19415857  | 19418930  | <i>Gm21738</i>       | 7,546367454  | 11,27633001 | 2,01944E-80 |
| chr14_32408203_32465909   | chr14 | 32408203  | 32465909  | <i>Chat</i>          | 4,152679748  | 8,13374732  | 0,033443779 |
| chr14_44858671_44974944   | chr14 | 44858671  | 44974944  | <i>Gm16976</i>       | 4,269409076  | 8,246992418 | 0,000226064 |
| chr14_64652531_64806296   | chr14 | 64652531  | 64806296  | <i>Kif13b</i>        | 3,229211226  | 8,736018234 | 0,026754231 |
| chr14_66140960_66152948   | chr14 | 66140960  | 66152948  | <i>Chrna2</i>        | 5,509175364  | 6,569853936 | 0,025014668 |
| chr15_4898737_4962203     | chr15 | 4898737   | 4962203   | <i>Mroh2b</i>        | 4,599687368  | 7,869412262 | 0,027491853 |
| chr15_74606029_74636298   | chr15 | 74606029  | 74636298  | <i>Mroh4</i>         | 5,401858871  | 8,325299657 | 3,0263E-08  |
| chr15_83357526_83367282   | chr15 | 83357526  | 83367282  | <i>1700001L05Rik</i> | 10,685279    | 5,616886888 | 0,016507372 |
| chr16_33829665_33949153   | chr16 | 33829665  | 33949153  | <i>Itgb5</i>         | 3,40355725   | 8,709172393 | 0,023413846 |
| chr17_3076578_3084183     | chr17 | 3076578   | 3084183   | <i>Pisd-ps2</i>      | 7,210290328  | 7,019574733 | 2,48484E-05 |
| chr17_37001163_37010635   | chr17 | 37001163  | 37010635  | <i>Zfp57</i>         | 10,54784705  | 5,107017647 | 0,047349435 |
| chr17_53716509_53733843   | chr17 | 53716509  | 53733843  | <i>4932415M13Rik</i> | 11,71032155  | 6,209777336 | 5,94833E-05 |
| chr18_10781723_10785883   | chr18 | 10781723  | 10785883  | <i>Gm21747</i>       | 12,34681532  | 6,487111346 | 8,47286E-06 |
| chr18_12599926_12737050   | chr18 | 12599926  | 12737050  | <i>Ttc39c</i>        | -3,244562771 | 8,834381996 | 0,004261075 |
| chr18_36281097_36301521   | chr18 | 36281097  | 36301521  | <i>Pura</i>          | 6,962909968  | 7,754360341 | 1,13489E-05 |
| chr1_85246851_85255465    | chr1  | 85246851  | 85255465  | <i>Gm16028</i>       | 11,09060846  | 5,900021751 | 0,000890525 |

|                          |                          |                |              |             |             |
|--------------------------|--------------------------|----------------|--------------|-------------|-------------|
| chr19_43956307_43986556  | chr19_43956307_43986556  | <i>Cpn1</i>    | 5,573481293  | 6,951906771 | 0,008338811 |
| chr19_47501033_47537507  | chr19_47501033_47537507  | <i>Obfc1</i>   | 4,486536362  | 7,848776646 | 0,00181191  |
| chr19_47512982_47516578  | chr19_47512982_47516578  | <i>Gm19557</i> | 12,34043535  | 7,586933622 | 2,29441E-07 |
| chr19_5298331_5308738    | chr19_5298331_5308738    | <i>Gal3st3</i> | 5,318040572  | 6,575480927 | 0,044557652 |
| chr19_6062821_6068373    | chr19_6062821_6068373    | <i>Tm7sf2</i>  | 6,181181526  | 6,575242584 | 0,028223583 |
| chr19_7092014_7105729    | chr19_7092014_7105729    | <i>Flrt1</i>   | 10,03320356  | 7,092658857 | 8,18872E-09 |
| chr19_8591254_8611834    | chr19_8591254_8611834    | <i>Slc22a8</i> | 6,154424168  | 6,411529411 | 0,020908666 |
| chr2_172393794_172433757 | chr2_172393794_172433757 | <i>Cass4</i>   | 3,789808102  | 8,481844903 | 0,000581211 |
| chr2_23068168_23114510   | chr2_23068168_23114510   | <i>Acbd5</i>   | 7,091393483  | 7,014908498 | 9,15384E-05 |
| chr2_28315016_28324050   | chr2_28315016_28324050   | <i>Gm13373</i> | 11,70127308  | 6,434235174 | 3,98433E-05 |
| chr2_84330626_84425411   | chr2_84330626_84425411   | <i>Calclrl</i> | -5,171987713 | 6,819864457 | 0,03594058  |
| chr2_98662237_98664083   | chr2_98662237_98664083   | <i>Gm10801</i> | 6,73632588   | 10,96506387 | 3,25817E-60 |
| chr2_98666547_98667301   | chr2_98666547_98667301   | <i>Gm10800</i> | 6,46390988   | 13,24452273 | 5,6775E-199 |
| chr3_10417819_10440124   | chr3_10417819_10440124   | <i>Snx16</i>   | 4,976827528  | 7,157372382 | 0,044991006 |
| chr3_18054325_18057509   | chr3_18054325_18057509   | <i>Bhlhe22</i> | -11,15937646 | 5,459748715 | 0,039286607 |
| chr3_20248264_20275733   | chr3_20248264_20275733   | <i>Cpb1</i>    | 5,309179248  | 8,537871086 | 9,30293E-08 |
| chr3_30995747_31052741   | chr3_30995747_31052741   | <i>Prkci</i>   | 4,796718472  | 7,56758201  | 0,00064231  |
| chr3_85574119_85655622   | chr3_85574119_85655622   | <i>Pet112</i>  | 5,14664974   | 7,678997721 | 0,000470219 |
| chr3_87357881_87371074   | chr3_87357881_87371074   | <i>Cd5l</i>    | 12,6803478   | 7,454408039 | 4,63159E-13 |
| chr4_107134155_107179116 | chr4_107134155_107179116 | <i>Tceanc2</i> | 5,114040641  | 9,025613449 | 4,07866E-09 |
| chr4_108165437_108179308 | chr4_108165437_108179308 | <i>Echdc2</i>  | 12,83475508  | 6,874000412 | 9,45949E-09 |
| chr4_125490700_125714173 | chr4_125490700_125714173 | <i>Grik3</i>   | 3,325940061  | 9,432653014 | 3,36928E-05 |
| chr4_134065912_134092504 | chr4_134065912_134092504 | <i>Aim1l</i>   | 4,932907253  | 7,310376945 | 0,049070619 |
| chr4_136880129_136886187 | chr4_136880129_136886187 | <i>Clqb</i>    | -9,62372559  | 6,774645443 | 1,97935E-06 |
| chr4_139653538_139670280 | chr4_139653538_139670280 | <i>Tas1r2</i>  | 5,712264735  | 7,380261261 | 0,002494452 |
| chr4_147136278_147457019 | chr4_147136278_147457019 | <i>Gm26624</i> | 5,596658334  | 8,205763331 | 4,51251E-09 |
| chr4_148558429_148582401 | chr4_148558429_148582401 | <i>Exosc10</i> | 5,651506495  | 6,810816645 | 0,00901861  |
| chr4_155260129_155361361 | chr4_155260129_155361361 | <i>Prkcz</i>   | 5,36435476   | 8,936716226 | 3,35024E-10 |
| chr4_72117142_72200919   | chr4_72117142_72200919   | <i>Tle1</i>    | 4,066391059  | 8,375952259 | 0,004565679 |
| chr5_114917318_114923277 | chr5_114917318_114923277 | <i>Gm13822</i> | 5,865934452  | 6,893369327 | 0,000784734 |
| chr5_120861421_120873512 | chr5_120861421_120873512 | <i>Oas1h</i>   | 11,71091706  | 6,052533243 | 3,01118E-05 |
| chr5_125277087_125341094 | chr5_125277087_125341094 | <i>Scarb1</i>  | 4,759738825  | 7,372061119 | 0,023119428 |
| chr5_25759997_25850342   | chr5_25759997_25850342   | <i>Actr3b</i>  | 5,704221812  | 8,292123251 | 1,22554E-07 |
| chr5_35041553_35048436   | chr5_35041553_35048436   | <i>Hgfac</i>   | 6,700607755  | 6,782447523 | 0,017940977 |
| chr6_113471427_113483140 | chr6_113471427_113483140 | <i>Il17rc</i>  | 6,997670729  | 6,668080174 | 0,001306456 |
| chr6_116208033_116262668 | chr6_116208033_116262668 | <i>Fam21</i>   | 5,875100794  | 7,569363118 | 4,05305E-05 |
| chr6_121838541_121889057 | chr6_121838541_121889057 | <i>Mug1</i>    | 5,03100315   | 7,30234535  | 0,001791221 |
| chr6_37327255_37442146   | chr6_37327255_37442146   | <i>Creb3l2</i> | 3,377520967  | 9,073866505 | 0,016515874 |
| chr6_48130918_48395408   | chr6_48130918_48395408   | <i>Gm16630</i> | 3,658281726  | 8,110438719 | 0,016857867 |
| chr6_49036518_49058182   | chr6_49036518_49058182   | <i>GpnmB</i>   | 5,492948551  | 7,934191386 | 2,87677E-06 |
| chr6_91464276_91473423   | chr6_91464276_91473423   | <i>Chchd4</i>  | 6,545174437  | 7,456994739 | 0,00176444  |
| chr7_122670492_122769393 | chr7_122670492_122769393 | <i>Cacng3</i>  | 3,769514826  | 8,200921226 | 0,031470439 |
| chr7_127191660_127196000 | chr7_127191660_127196000 | <i>Cd2bp2</i>  | -4,888420061 | 7,079640711 | 0,00923379  |
| chr7_25619414_25625551   | chr7_25619414_25625551   | <i>Atp5sl</i>  | 12,44607539  | 5,642912591 | 0,003145368 |
| chr7_45976380_46030302   | chr7_45976380_46030302   | <i>Abcc6</i>   | 5,095581346  | 7,25715469  | 0,027687467 |
| chr7_66390892_66427517   | chr7_66390892_66427517   | <i>Aldh1a3</i> | 4,866812079  | 8,330230401 | 5,01933E-05 |
| chr7_80429210_80430740   | chr7_80429210_80430740   | <i>Gm15544</i> | 12,72185126  | 7,129400261 | 2,92433E-09 |
| chr7_83584927_83625614   | chr7_83584927_83625614   | <i>Tmc3</i>    | 4,86193816   | 8,932640185 | 1,42351E-05 |
| chr7_83597048_83631842   | chr7_83597048_83631842   | <i>Gm16638</i> | 4,967137604  | 8,569070686 | 0,000120927 |
| chr8_109859984_109868455 | chr8_109859984_109868455 | <i>Gm17344</i> | 8,884146659  | 5,786345715 | 0,032711463 |
| chr8_111345135_111393824 | chr8_111345135_111393824 | <i>Fa2h</i>    | 6,046422878  | 7,631259735 | 6,01945E-05 |
| chr8_122578238_122611487 | chr8_122578238_122611487 | <i>Galns</i>   | 5,717186459  | 7,633220302 | 0,000107553 |
| chr8_13465374_13494535   | chr8_13465374_13494535   | <i>Gas6</i>    | 8,946049906  | 7,996229119 | 1,42969E-13 |

|                          |      |           |           |                      |              |             |             |
|--------------------------|------|-----------|-----------|----------------------|--------------|-------------|-------------|
| chr8_20267774_20424814   | chr8 | 20267774  | 20424814  | <i>2610005L07Rik</i> | 5,977425398  | 6,842118026 | 0,001313349 |
| chr8_20292477_20420781   | chr8 | 20292477  | 20420781  | <i>Gm26804</i>       | 5,437449078  | 6,638582006 | 0,039547756 |
| chr8_70302518_70312993   | chr8 | 70302518  | 70312993  | <i>Cope</i>          | 8,759639297  | 6,658048523 | 0,000332194 |
| chr8_71396855_71404772   | chr8 | 71396855  | 71404772  | <i>Babam1</i>        | 4,924988231  | 7,272610284 | 0,004334006 |
| chr8_74590987_74833947   | chr8 | 74590987  | 74833947  | <i>Gm11033</i>       | 2,914082792  | 9,263333906 | 0,010363723 |
| chr8_84990595_85003364   | chr8 | 84990595  | 85003364  | <i>Hook2</i>         | 5,88758878   | 6,926564662 | 0,010979108 |
| chr9_110865711_110880113 | chr9 | 110865711 | 110880113 | <i>Tmie</i>          | 7,434424585  | 8,078489759 | 1,76821E-11 |
| chr9_111439081_111489608 | chr9 | 111439081 | 111489608 | <i>Dclk3</i>         | 4,418472695  | 8,131332646 | 0,000358773 |
| chr9_20468549_20492746   | chr9 | 20468549  | 20492746  | <i>Zfp426</i>        | 6,8709592    | 7,334615754 | 1,0353E-05  |
| chr9_20770050_20815067   | chr9 | 20770050  | 20815067  | <i>Col5a3</i>        | 5,439785043  | 8,146594632 | 5,51004E-06 |
| chr9_3000282_3038313     | chr9 | 3000282   | 3038313   | <i>Gm26870</i>       | 7,652692948  | 13,36697924 | 4,4341E-270 |
| chr9_3000922_3002330     | chr9 | 3000922   | 3002330   | <i>Gm10722</i>       | 8,158350957  | 10,20332496 | 5,01936E-50 |
| chr9_3003346_3006948     | chr9 | 3003346   | 3006948   | <i>Gm11168</i>       | 7,577367218  | 10,43059198 | 1,23587E-50 |
| chr9_3015654_3017210     | chr9 | 3015654   | 3017210   | <i>Gm10720</i>       | 11,16908851  | 6,926367318 | 2,13503E-08 |
| chr9_3017408_3021593     | chr9 | 3017408   | 3021593   | <i>Gm10719</i>       | 7,330335759  | 9,192448379 | 2,07774E-24 |
| chr9_3023547_3025218     | chr9 | 3023547   | 3025218   | <i>Gm10718</i>       | 6,774808275  | 10,98695999 | 2,76481E-58 |
| chr9_3025417_3033289     | chr9 | 3025417   | 3033289   | <i>Gm10717</i>       | 8,332025627  | 10,91265059 | 1,25301E-75 |
| chr9_3034599_3035805     | chr9 | 3034599   | 3035805   | <i>Gm17535</i>       | 12,48411074  | 8,413677184 | 1,48102E-23 |
| chr9_3036877_3038316     | chr9 | 3036877   | 3038316   | <i>Gm10715</i>       | 11,03249816  | 6,896222485 | 5,43135E-08 |
| chr9_56135885_56161070   | chr9 | 56135885  | 56161070  | <i>Tspan3</i>        | 6,461323641  | 7,744852074 | 1,99372E-08 |
| chrX_133891068_133898429 | chrX | 133891068 | 133898429 | <i>Tspan6</i>        | -7,474031354 | 6,553125517 | 0,019045655 |
| chrX_38013173_38018815   | chrX | 38013173  | 38018815  | <i>4930525M21Rik</i> | 11,00951128  | 5,77509237  | 0,011027024 |
| chrX_38013908_38018815   | chrX | 38013908  | 38018815  | <i>4930525M21RIK</i> | 11,01227313  | 5,770080356 | 0,011225712 |
