# Supplementary material for: Identification and Characterization of Extracellular Vesicles and Its DNA Cargo Secreted During Murine Embryo Development
Source: MDPI journal article supplement (doi:10.3390/genes11020203), 2020-02-17
Supplement: s1 [file s1]

**Table S3. Sequencing analysis data for the enriched genes in the comparison ABs vs blank control for total gene sequences.**

| id                        | chr   | start     | end       | gene                 | logFC        | logCPM      | FWER        |
|---------------------------|-------|-----------|-----------|----------------------|--------------|-------------|-------------|
| chr11_3125904_3131004     | chr11 | 3125904   | 3131004   | <i>Pisd-ps1</i>      | 8,377409728  | 7,397255473 | 2,77181E-05 |
| chr11_3131850_3193463     | chr11 | 3131850   | 3193463   | <i>Sfi1</i>          | 5,263058812  | 10,22434998 | 7,32064E-07 |
| chr13_119487941_119610458 | chr13 | 119487941 | 119610458 | <i>Gm7120</i>        | 6,288160646  | 7,263377184 | 0,003691524 |
| chr17_3076578_3084183     | chr17 | 3076578   | 3084183   | <i>Pisd-ps2</i>      | 8,308132225  | 6,515271948 | 0,002081191 |
| chr1_84992690_85270566    | chr1  | 84992690  | 85270566  | <i>C130026I21Rik</i> | 4,641247141  | 7,835852661 | 0,048388644 |
| chr2_177314520_177324307  | chr2  | 177314520 | 177324307 | <i>Gm14412</i>       | 8,700030176  | 5,312666059 | 0,02411207  |
| chr4_101647718_101659364  | chr4  | 101647718 | 101659364 | <i>Leprot</i>        | 9,285428475  | 5,488775337 | 0,02044234  |
| chr4_146449023_146470292  | chr4  | 146449023 | 146470292 | <i>Gm13251</i>       | 9,413498047  | 5,716532392 | 0,016001444 |
| chr4_147018235_147492201  | chr4  | 147018235 | 147492201 | <i>C230088H06Rik</i> | 3,380258801  | 8,922407064 | 0,008846457 |
| chr4_147136278_147457019  | chr4  | 147136278 | 147457019 | <i>Gm26624</i>       | 5,61626115   | 8,424748607 | 0,000117139 |
| chr4_147553277_147585198  | chr4  | 147553277 | 147585198 | <i>Gm13154</i>       | 6,49827767   | 6,296469044 | 0,046569157 |
| chr5_114917318_114923277  | chr5  | 114917318 | 114923277 | <i>Gm13822</i>       | 7,420537693  | 6,688467058 | 7,34011E-05 |
| chr7_127191660_127196000  | chr7  | 127191660 | 127196000 | <i>Cd2bp2</i>        | -9,375145172 | 5,667493084 | 0,027722358 |
| chr8_20267774_20424814    | chr8  | 20267774  | 20424814  | <i>2610005L07Rik</i> | 7,095771195  | 6,896152288 | 0,000379027 |
| chr8_20292477_20420781    | chr8  | 20292477  | 20420781  | <i>Gm26804</i>       | 7,302874415  | 6,50456744  | 0,003349933 |
| chr9_3025417_3033289      | chr9  | 3025417   | 3033289   | <i>Gm10717</i>       | 5,89472124   | 10,88613073 | 0,031777456 |
| chr9_3034599_3035805      | chr9  | 3034599   | 3035805   | <i>Gm17535</i>       | 7,566832805  | 7,805421127 | 4,76437E-05 |
| chr9_3036877_3038316      | chr9  | 3036877   | 3038316   | <i>Gm10715</i>       | 7,086439359  | 7,297505812 | 0,000816605 |
