# Supplementary material for: Identification and Characterization of Extracellular Vesicles and Its DNA Cargo Secreted During Murine Embryo Development
Source: MDPI journal article supplement (doi:10.3390/genes11020203), 2020-02-17
Supplement: s1 [file s1]

**Table S2. Sequencing analysis data for the enriched genes in the comparison Embryo vs blank control for total gene sequences.**

| id                        | chr   | start    | end      | gene                 | logFC      | logCPM     | FWER        |
|---------------------------|-------|----------|----------|----------------------|------------|------------|-------------|
| chr11_3125904_3131004     | chr11 | 3125904  | 3131004  | <i>Pisd-ps1</i>      | 9,14344287 | 7,39725547 | 7,51079E-06 |
| chr11_3131850_3193463     | chr11 | 3131850  | 3193463  | <i>Sfi1</i>          | 5,61433566 | 10,22435   | 1,49206E-07 |
| chr13_119487941_119610458 | chr13 | 1,19E+08 | 1,2E+08  | <i>Gm7120</i>        | 6,19544234 | 7,26337718 | 0,005840259 |
| chr17_3076578_3084183     | chr17 | 3076578  | 3084183  | <i>Pisd-ps2</i>      | 8,56004983 | 6,51527195 | 0,000781297 |
| chr2_177314520_177324307  | chr2  | 1,77E+08 | 1,77E+08 | <i>Gm14412</i>       | 8,65659082 | 5,31266606 | 0,025122778 |
| chr4_147018235_147492201  | chr4  | 1,47E+08 | 1,47E+08 | <i>C230088H06Rik</i> | 3,10307501 | 8,92240706 | 0,035323838 |
| chr4_147136278_147457019  | chr4  | 1,47E+08 | 1,47E+08 | <i>Gm26624</i>       | 5,22356555 | 8,42474861 | 0,000282673 |
| chr5_114917318_114923277  | chr5  | 1,15E+08 | 1,15E+08 | <i>Gm13822</i>       | 7,14007375 | 6,68846706 | 0,00013457  |
| chr8_20267774_20424814    | chr8  | 20267774 | 20424814 | <i>2610005L07Rik</i> | 7,04452224 | 6,89615229 | 0,000350043 |
| chr8_20292477_20420781    | chr8  | 20292477 | 20420781 | <i>Gm26804</i>       | 7,15069283 | 6,50456744 | 0,003469338 |
| chr9_3015654_3017210      | chr9  | 3015654  | 3017210  | <i>Gm10720</i>       | 7,08801769 | 7,89732859 | 0,001110643 |
| chr9_3025417_3033289      | chr9  | 3025417  | 3033289  | <i>Gm10717</i>       | 7,70653357 | 10,8861307 | 0,002442111 |
| chr9_3034599_3035805      | chr9  | 3034599  | 3035805  | <i>Gm17535</i>       | 9,71364358 | 7,80542113 | 5,6766E-07  |
| chr9_3036877_3038316      | chr9  | 3036877  | 3038316  | <i>Gm10715</i>       | 9,16978639 | 7,29750581 | 1,08229E-05 |
