# Supplementary material for: Identification and Characterization of Extracellular Vesicles and Its DNA Cargo Secreted During Murine Embryo Development
Source: MDPI journal article supplement (doi:10.3390/genes11020203), 2020-02-17
Supplement: s1 [file s1]

**Table S1. DNA sequencing reads, and mapping statistics.**

| <b>Sample</b>       | <b>Total reads</b> | <b>Unmapped reads (%)</b> | <b>q10 reads (%)</b> | <b>Duplicate reads (%)</b> | <b>Valid reads (%)</b> |
|---------------------|--------------------|---------------------------|----------------------|----------------------------|------------------------|
| Embryo -DNase Set A | 54,274,197         | 180,665 (0.33)            | 24,917,798 (45.91)   | 7,167,123 (13.21)          | 22,008,611 (40.55)     |
| Embryo -DNase Set B | 35,827,722         | 101,039 (0.28)            | 14,724,678 (41.10)   | 5,238,097 (14.62)          | 15,763,908 (44.00)     |
| Embryo -DNase Set C | 37,511,254         | 108,280 (0.29)            | 14,550,852 (38.79)   | 4,294,532 (11.45)          | 18,557,590 (49.47)     |
| Embryo -DNase Set D | 28,362,627         | 101,760 (0.36)            | 7,028,758 (24.78)    | 3,037,951 (10.71)          | 18,194,158 (64.15)     |
| AB -DNase Set A     | 60,941,941         | 894,888 (1.47)            | 10,025,278 (16.45)   | 7,022,766 (11.52)          | 42,999,009 (70.56)     |
| AB -DNase Set B     | 50,857,885         | 166,853 (0.33)            | 8,514,415 (16.74)    | 2,951,505 (5.80)           | 39,225,112 (77.13)     |
| AB -DNase Set D     | 50,051,241         | 183,887 (0.37)            | 9,322,997 (18.63)    | 3,598,577 (7.19)           | 36,945,780 (73.82)     |
| AB +DNase Set A     | 48,055,108         | 18,715,589 (38.95)        | 15,347,029 (31.94)   | 9,374,708 (19.51)          | 4,617,782 (9.61)       |
| AB +DNase Set B     | 41,517,087         | 13,821,014 (33.29)        | 11,139,708 (26.83)   | 8,385,028 (20.20)          | 8,171,337 (19.68)      |
| AB +DNase Set D     | 54,989,754         | 4,841,168 (8.80)          | 22,533,188 (40.98)   | 24,229,269 (44.06)         | 3,386,129 (6.16)       |
| naEVs -DNase Set A  | 55,700,778         | 168,107 (0.30)            | 19,712,479 (35.39)   | 4,931,459 (8.85)           | 30,888,733 (55.45)     |
| naEVs -DNase Set B  | 26,138,898         | 102,238 (0.39)            | 7,610,236 (29.11)    | 1,618,270 (6.19)           | 16,808,154 (64.30)     |
| naEVs -DNase Set C  | 29,684,788         | 81,242 (0.27)             | 5,839,112 (19.67)    | 2,107,135 (7.10)           | 21,657,299 (72.96)     |
| naEVs -DNase Set D  | 45,018,553         | 163,213 (0.36)            | 9,205,664 (20.45)    | 3,071,051 (6.82)           | 32,578,625 (72.37)     |
| naEVs +DNase Set A  | 63,060,670         | 3,669,169 (5.82)          | 21,735,122 (34.47)   | 22,812,610 (36.18)         | 14,843,769 (23.54)     |
| naEVs +DNase Set B  | 37,790,010         | 9,618,074 (25.42)         | 13,190,374 (34.90)   | 7,502,293 (19.85)          | 7,479,269 (19.79)      |
| naEVs +DNase Set C  | 30,470,420         | 4,679,611 (15.36)         | 10,943,879 (35.92)   | 9,005,929 (29.56)          | 5,841,001 (19.17)      |
| naEVs +DNase Set D  | 38,060,061         | 7,895,316 (20.74)         | 12,140,036 (31.90)   | 11,852,748 (31.14)         | 6,171,961 (16.22)      |
| Blank -Dnase Set A  | 48,626,830         | 22,748,470 (46.78)        | 13,201,966 (27.15)   | 3,447,837 (7.09)           | 9,228,557 (18.98)      |
| Blank -Dnase Set B  | 33,280,407         | 16,576,757 (49.81)        | 8,740,996 (26.26)    | 1,828,273 (5.49)           | 6,134,381 (18.43)      |
| Blank -Dnase Set D  | 53,970,000         | 24,900,066 (46.14)        | 14,234,067 (26.37)   | 2,367,844 (4.39)           | 12,468,023 (23.10)     |
| SN -DNase Set A     | 54,334,141         | 6,957,272 (12.80)         | 11,058,495 (20.35)   | 12,583,159 (23.16)         | 23,735,215 (43.68)     |
| SN -DNase Set B     | 23,756,570         | 1,109,633 (4.67)          | 4,812,808 (20.26)    | 1,512,310 (6.37)           | 16,321,819 (68.70)     |
| SN -DNase Set D     | 43,776,010         | 2,176,044 (4.97)          | 13,624,551 (31.12)   | 4,165,205 (9.51)           | 23,810,210 (54.39)     |
